# Supplementary material for: Secular Trends of Liver Cancer Mortality and Years of Life Lost in Wuhan, China 2010–2019
Source: MDPI journal article supplement (doi:10.3390/curroncol30010071), 2023-01-09
Supplement: s1 [file s1]

Table S1.ASMR per 100 000 of liver cancer in Wuhan from 2010 to 2019

|      | Both  | Men   | Women |
|------|-------|-------|-------|
| 2010 | 30.87 | 47.15 | 14.90 |
| 2011 | 29.33 | 43.62 | 15.32 |
| 2012 | 28.45 | 42.29 | 14.93 |
| 2013 | 28.08 | 42.94 | 13.58 |
| 2014 | 27.19 | 40.68 | 13.98 |
| 2015 | 24.89 | 37.73 | 12.32 |
| 2016 | 22.97 | 34.73 | 11.46 |
| 2017 | 23.87 | 36.47 | 11.56 |
| 2018 | 20.56 | 33.05 | 8.52  |
| 2019 | 20.29 | 31.13 | 9.78  |

Table S2. ASYR per 100 000 of liver cancer in Wuhan from 2010 to 2019

|      | Both   | Men     | Women  |
|------|--------|---------|--------|
| 2010 | 969.35 | 1507.56 | 430.50 |
| 2011 | 907.40 | 1374.47 | 441.08 |
| 2012 | 860.72 | 1310.85 | 412.84 |
| 2013 | 860.87 | 1338.43 | 384.94 |
| 2014 | 812.87 | 1243.75 | 382.54 |
| 2015 | 736.38 | 1145.78 | 328.40 |
| 2016 | 672.18 | 1050.56 | 294.53 |
| 2017 | 694.03 | 1099.95 | 290.70 |
| 2018 | 587.37 | 967.62  | 212.76 |
| 2019 | 581.82 | 923.01  | 243.48 |
